# Supplementary material
Source: HighWire-hosted journal article supplement (https://bmjopen.bmj.com/content/9/5/e028428)
Supplement: inline-supplementary-material-1 [file inline-supplementary-material-1.pdf]

## Appendix 1: Administrative information

### Title

TEST (Trial of Eczema allergy Screening Tests): a single centre, individually randomised, two-group feasibility randomised controlled trial of allergy tests in children with eczema, with economic scoping and nested qualitative study

### Trial registration number

ISRCTN: 15397185 (30 July 2018)

### World Health Organization Trial Registration Data Set

| Data category                                 | Information                                                                                                                                                                                                                                                                                                                                                                                               |
|-----------------------------------------------|-----------------------------------------------------------------------------------------------------------------------------------------------------------------------------------------------------------------------------------------------------------------------------------------------------------------------------------------------------------------------------------------------------------|
| Primary registry and trial identifying number | ISRCTN 15397185                                                                                                                                                                                                                                                                                                                                                                                           |
| Date of registration in primary registry      | 30 July 2018                                                                                                                                                                                                                                                                                                                                                                                              |
| Secondary identifying numbers                 | IRAS: 237046<br>NHS REC: 18/WM/0124                                                                                                                                                                                                                                                                                                                                                                       |
| Source(s) of monetary or material support     | NIHR School for Primary Care Research                                                                                                                                                                                                                                                                                                                                                                     |
| Primary sponsor                               | University of Bristol                                                                                                                                                                                                                                                                                                                                                                                     |
| Secondary sponsor(s)                          | Not applicable                                                                                                                                                                                                                                                                                                                                                                                            |
| Contact for public queries                    | Mr Doug Webb, test-study@bristol.ac.uk, 0117 928 7351                                                                                                                                                                                                                                                                                                                                                     |
| Contact for scientific queries                | Dr Matthew Ridd FRCGP PhD, m.ridd@bristol.ac.uk, 0117 331 4557                                                                                                                                                                                                                                                                                                                                            |
| Public title                                  | Trial of Eczema allergy Screening Tests (TEST)                                                                                                                                                                                                                                                                                                                                                            |
| Scientific title                              | The TEST (Trial of Eczema Allergy Screening Tests) study: feasibility randomised controlled trial with economic scoping and nested qualitative study                                                                                                                                                                                                                                                      |
| Countries of recruitment                      | England                                                                                                                                                                                                                                                                                                                                                                                                   |
| Health condition(s) or problem(s) studied     | Childhood eczema                                                                                                                                                                                                                                                                                                                                                                                          |
| Intervention(s)                               | Structured allergy history and skin prick tests; depending on outcome of these tests, reassurance, repeat skin prick test(s), oral food challenge and/or home dietary trial of exclusion or inclusion                                                                                                                                                                                                     |
| Key inclusion and exclusion criteria          | Inclusion: aged between 3 months and less than 5 years; eczema diagnosed by an appropriately qualified healthcare professional; mild, moderate or severe eczema (Patient Orientated Eczema Measure (POEM) score>2)<br>Exclusion: medically-diagnosed food allergy or awaiting referral/investigations for possible food allergy; previous investigations for food allergy (does not include home testing) |
| Study type                                    | Intervention                                                                                                                                                                                                                                                                                                                                                                                              |

|                         |                                                                                                                                                                                                                                                                                                                                                                                                                                                                                                                                                                                                                                                                                                                                                                                                                                                                                                                                                       |
|-------------------------|-------------------------------------------------------------------------------------------------------------------------------------------------------------------------------------------------------------------------------------------------------------------------------------------------------------------------------------------------------------------------------------------------------------------------------------------------------------------------------------------------------------------------------------------------------------------------------------------------------------------------------------------------------------------------------------------------------------------------------------------------------------------------------------------------------------------------------------------------------------------------------------------------------------------------------------------------------|
| Date of first enrolment | 12 September 2018                                                                                                                                                                                                                                                                                                                                                                                                                                                                                                                                                                                                                                                                                                                                                                                                                                                                                                                                     |
| Target sample size      | 80                                                                                                                                                                                                                                                                                                                                                                                                                                                                                                                                                                                                                                                                                                                                                                                                                                                                                                                                                    |
| Recruitment status      | Recruiting                                                                                                                                                                                                                                                                                                                                                                                                                                                                                                                                                                                                                                                                                                                                                                                                                                                                                                                                            |
| Primary outcome(s)      | The feasibility of conducting the trial (recruitment, retention, contamination) and collecting the required data: recruitment and retention rates; acceptability of recruitment, intervention and follow-up procedures to parents/carers; acceptability of trial processes and procedures to GPs; development and refinement of a manual on the interpretation of test results and dietary advice to be given; number of participants in the intervention group with positive/negative tests; adherence to dietary advice; contamination of the control group; acceptability and feasibility of collecting clinical outcomes; feasibility and optimise collection of patient-level data on NHS and personal resource use; feasibility of using the CHU-9D in children under 5 years of age; inform eligibility criteria for the future definitive trial; detection bias in the collection of patient-reported outcomes; trial processes and logistics |
| Key secondary outcomes  | Eczema symptoms, measured using POEM; eczema signs, measured using EASI; eczema 'bother' score; itch intensity score; parent global assessment of eczema; other possible symptoms of food allergy; UK diagnostic criteria for atopic dermatitis; main carer anxiety, measured using GAD-7; diet of child and/or mother if child being breastfed by her; adverse events; child and family quality of life, measured using ADQoL, CHU-9D and IDQoL; satisfaction with trial processes, procedures and paperwork; health services utilisation; out-of-pocket expenses/time off work.                                                                                                                                                                                                                                                                                                                                                                     |

## Protocol version

Version 2.0 (18 October 2018)

| Version |          | Notes                                                                                                                                                                                                                                                                                                                                                                                                                                                                                                                                                                                                                                                                                                                                                                                                                                                                                                                                                                                                                                                                                                            |
|---------|----------|------------------------------------------------------------------------------------------------------------------------------------------------------------------------------------------------------------------------------------------------------------------------------------------------------------------------------------------------------------------------------------------------------------------------------------------------------------------------------------------------------------------------------------------------------------------------------------------------------------------------------------------------------------------------------------------------------------------------------------------------------------------------------------------------------------------------------------------------------------------------------------------------------------------------------------------------------------------------------------------------------------------------------------------------------------------------------------------------------------------|
| Number  | Date     |                                                                                                                                                                                                                                                                                                                                                                                                                                                                                                                                                                                                                                                                                                                                                                                                                                                                                                                                                                                                                                                                                                                  |
| 2.0     | 18.10.18 | <p>Section 5.2: addition of missing data collection points (Diet of child and breast-feeding mother at baseline; ADQoL at 8 weeks)</p> <p>Section 8.4: change "avoidance of food(s) with dietary advice; and referral via GP for follow-up" to "avoidance of food(s) with dietary advice; and referral to the local NHS allergy services via GP for longer-term follow-up" ; and "Any participants with indeterminate results will be reviewed by an expert allergy panel (co-applicants Boyle &amp; Marriage) ..." to "All participants' results will be reviewed by an expert allergy panel (including co-applicants Ridd, Boyle, Marriage and/or Waddell) ..."</p> <p>Section 9.1: change "Up to 12 GP surgeries" to "At least 12 GP surgeries ...";</p> <p>Section 9.3 &amp; section 10.2: change "in/at their [own] GP practice" to "at a participating GP practice";</p> <p>Section 10.1: description of expression of interest form corrected from "The form will comprise which will comprise POEM, questions asking their opinion of the role of diet/food allergy in their child's eczema, and any</p> |

|     |          |                                                                                                                                                                                                                                                                                                                                                                                                                                                                                                                                                                                                                                                                                                                                                                                                                                                                                                                                                                   |
|-----|----------|-------------------------------------------------------------------------------------------------------------------------------------------------------------------------------------------------------------------------------------------------------------------------------------------------------------------------------------------------------------------------------------------------------------------------------------------------------------------------------------------------------------------------------------------------------------------------------------------------------------------------------------------------------------------------------------------------------------------------------------------------------------------------------------------------------------------------------------------------------------------------------------------------------------------------------------------------------------------|
|     |          | <p>previous food allergy tests, diagnoses and/or dietary modifications” to “The form asks if they currently have eczema/a medically diagnosed food allergy and the POEM questions”</p> <p>Section 11.3: Change from “In addition, we will conduct brief telephone interviews with ~5-8 parents who decline to take part in response to the initial invitation letter or later withdrawal from the trial but indicate that they are willing to discuss reasons why” to “In addition, we will conduct brief telephone interviews with ~5-8 parents who are ineligible, decline to take part or withdrawal from the trial but indicate that they are willing to discuss reasons why”</p> <p>Section 16.1: change “Expected SAEs defined in the study protocol (page 39) ...” to “Expected SAEs as defined below ...”</p> <p>Section 18.1: revised project duration/milestones</p> <p>Other minor changes (correction of typing errors, changes in research team)</p> |
| 1.0 | 29.03.18 | Submitted/approved by REC/HRA                                                                                                                                                                                                                                                                                                                                                                                                                                                                                                                                                                                                                                                                                                                                                                                                                                                                                                                                     |

## Funding

NIHR School for Primary Care Research

## Contributorship

See main manuscript

## Sponsor contact information

Trial sponsor: University of Bristol

Sponsor’s reference: 2832

Contact name: Mrs Anna Brooke

Address: Research Enterprise Development, One Cathedral Square, Bristol BS1 5DD

Email: [research-governance@bristol.ac.uk](mailto:research-governance@bristol.ac.uk)

Telephone: 0117 428 4011

## Role of study sponsor and funder

The funder and sponsor had no role in the design of this study and will not have any role during its execution, analyses, interpretation of the data, or decision to submit results.

## Committees

The Trial Management Group (TMG) comprises all investigators, the trial manager, research and administrative staff, with input from patient/public representatives. Members of the TMG will contribute to the trial in the following ways: trial design and methods; participant recruitment and trial conduct; trial management; trial logistics and cost management; economic evaluation; qualitative study statistical data analysis; and publication. The TMG will meet on a regular basis to oversee the management of the trial. The TMG will be provided with detailed information by the centre staff regarding trial progress. Meetings will be face-to-face with teleconference facilities for TMG members who are unable to be present.

This study was designed and is being delivered in collaboration with the Bristol Randomised Trials Collaboration (BRTC), a UKCRC registered clinical trials unit which, as part of the Bristol Trials Centre, is in receipt of National Institute for Health Research CTU support funding. Members of the BRTC will attend the TMG.

Because this is a low-risk trial, the funder has agreed that the roles of both guiding the Trial Management Group and monitoring trial data will be undertaken by a single Trial Steering/Data Monitoring Committee (TS/DM-C). The TS/DM-C will meet at least three times over the course of the study and comprises four independent members: a chairperson, a biostatistician, a clinician, and a patient representative (parent of child with eczema). Their role will be to provide overall supervision of the trial on behalf of the funder, with a focus on progress of the trial, adherence to the protocol, patient safety and consideration of new information. The committee will review the accruing data and assess whether there are any safety issues that should be brought to the Sponsor's or the participants' attention or any reasons for the trial not to continue. Terms of reference will be drawn up and agreed with members of the TS/DM-C.
